# Supplementary material
Source: publisher site journal article supplement (https://www.spandidos-publications.com/3040/downloadSupplementary)

Figure S1. SAL (1.5 mg/ml) does not induce cytotoxicity in CEM-C1 and CEM-C7 cells. CEM-C1 and CEM-C7 cells were treated with 1.5 mg/ml SAL for 48 h. Cell viability was detected using the Cell Counting Kit-8 assay. Data are presented as the mean  $\pm$  SD. SAL, salidroside.

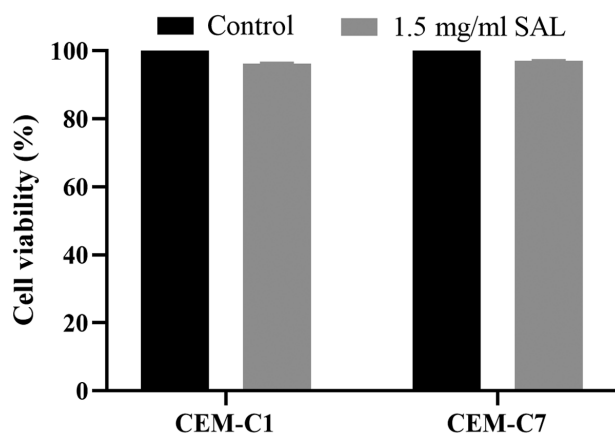

Figure S2. Effects of DEX and DEX+SAL on the  $IC_{50}$  in CEM-C1 and CEM-C7 cells. (A) CEM-C1 and (B) CEM-C7 cells. The data are presented as the mean  $\pm$  SD. \*\*\* $P < 0.001$ . ns, not significant; DEX, dexamethasone; SAL, salidroside.

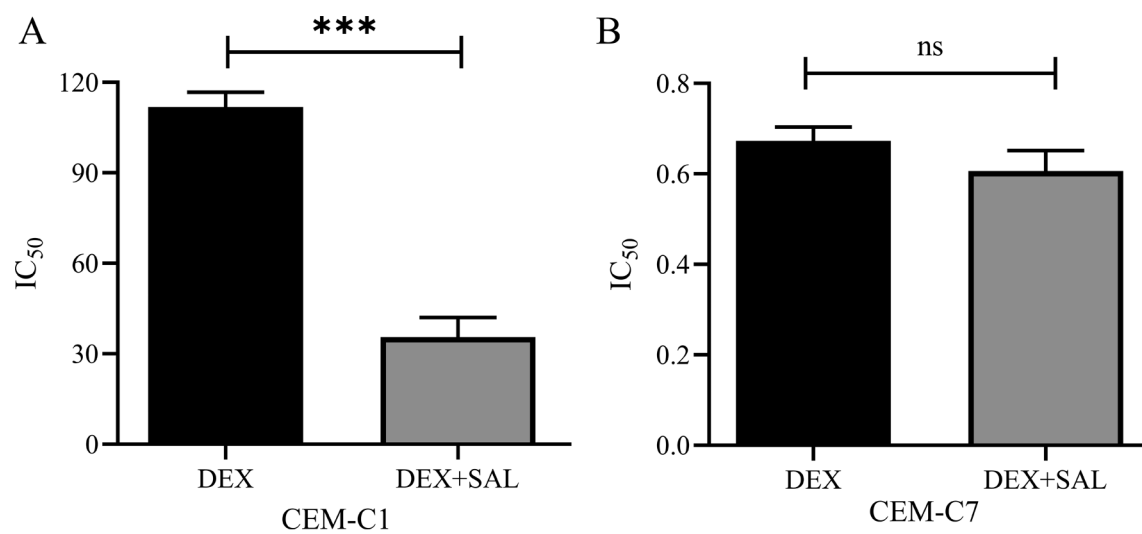

Supplement: Supplementary file 1 [file downloadSupplementary]
